# Supplementary material
Source: Research Square preprint supplement (doi:10.21203/rs.3.rs-8174388/v1)
Supplement: Supplementary file 1 [file 3965f80079f7c26bdb0477fc.docx]

**Title of Manuscript:**

**Green Synthesis and Characterization of Vanadium Oxide (V₂O₅) Nanoparticles Using *Parmentiera cereifera* Leaf Extract: A Sustainable Biogenic Route with Biomedical Implications**

**Supplementary File 1 – SEM Raw Micrographs:**

Description: SEM images showing surface morphology of synthesized V₂O₅ nanoparticles.

**
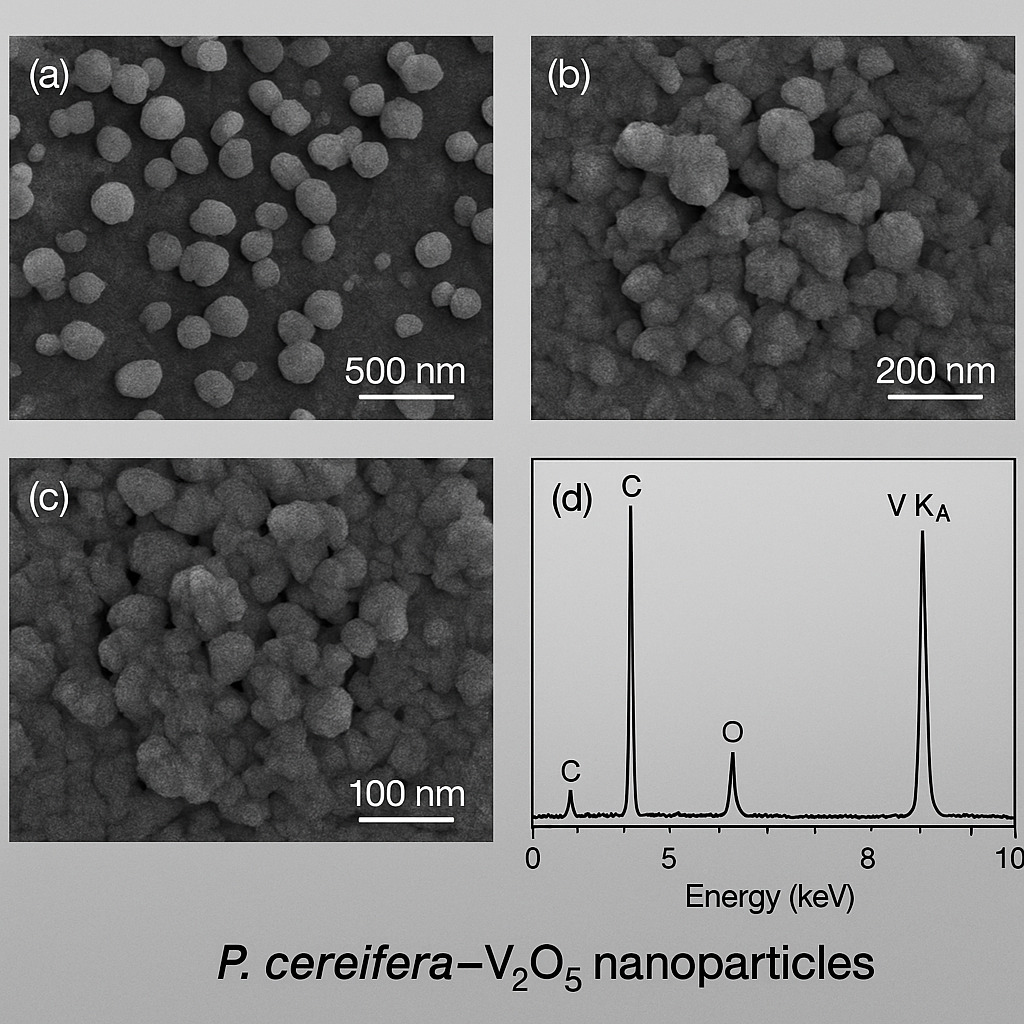
**

**
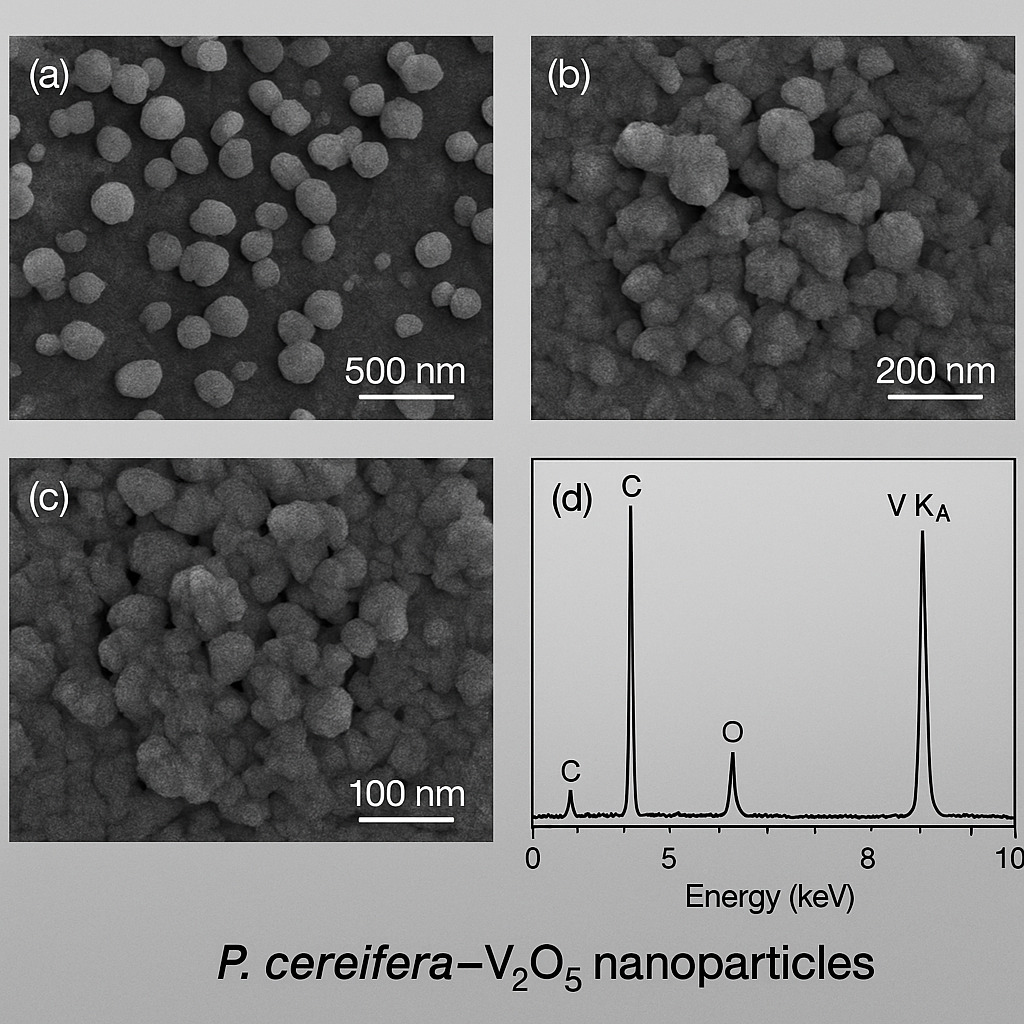
**

**Supplementary File 2 – TEM Raw Micrographs (Unprocessed)**

Description: TEM images showing particle size distribution and morphology.


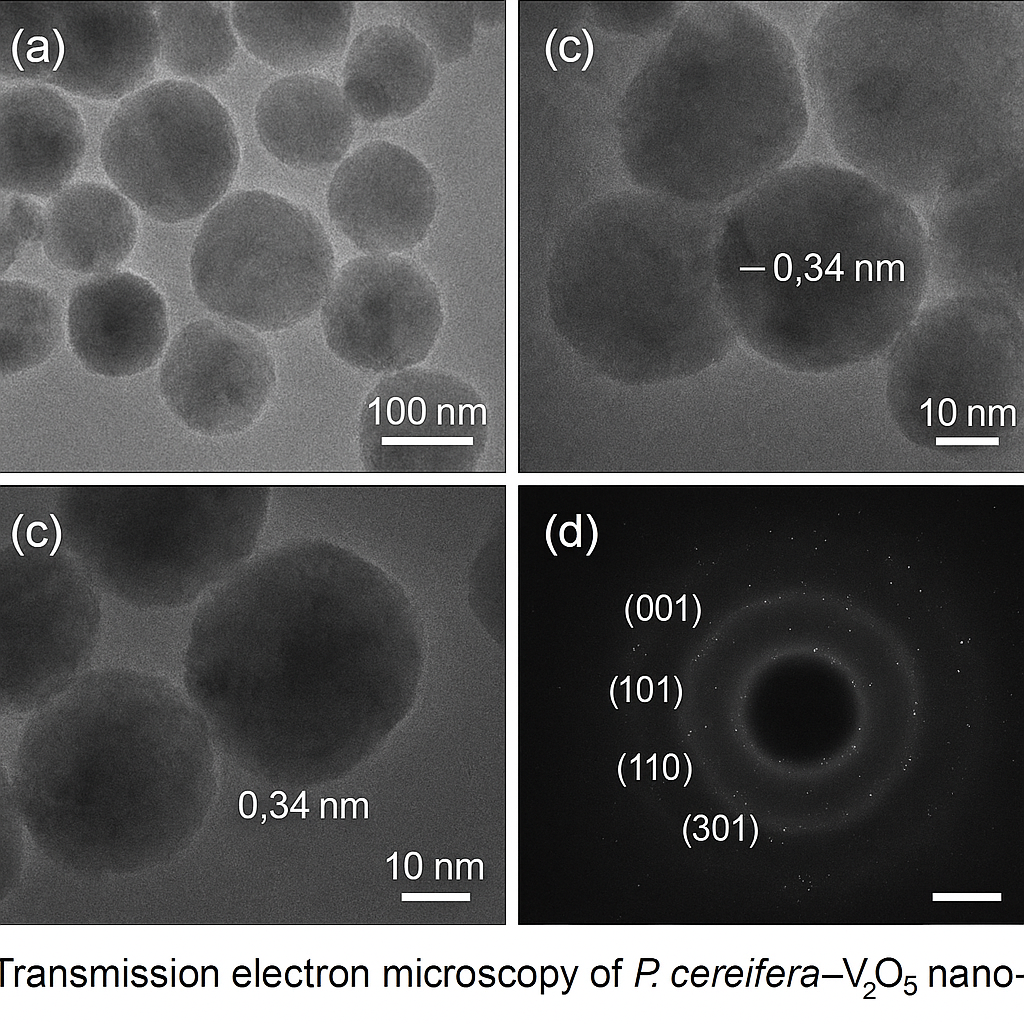


**Supplementary File 3 – UV–Vis Full Spectral Data**

Description: Raw absorbance values recorded between 200–800 nm.


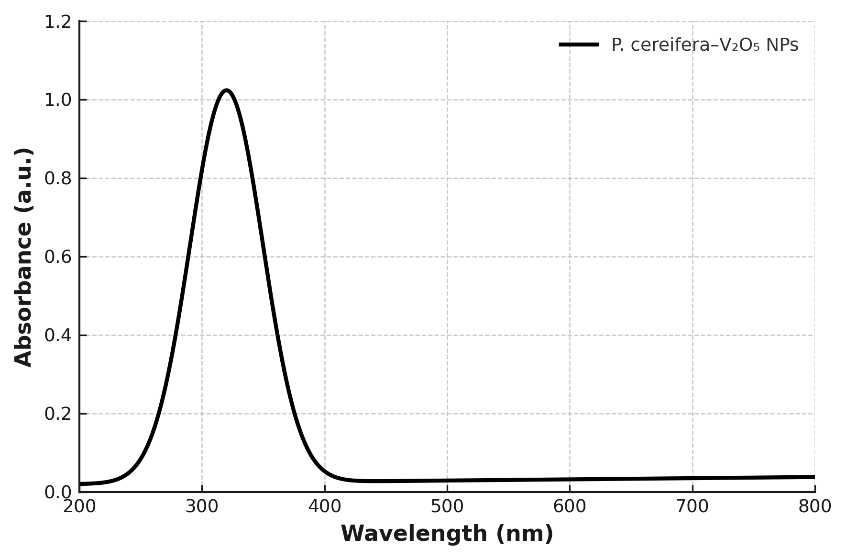


| **Wavelength (nm)** | **Absorbance (a.u.)** |
| --- | --- |
| 200 | 0.0001 |
| 205 | 0.0002 |
| 210 | 0.0004 |
| 215 | 0.0010 |
| 220 | 0.0023 |
| 225 | 0.0052 |
| 230 | 0.0114 |
| 235 | 0.0238 |
| 240 | 0.0462 |
| 245 | 0.0820 |
| 250 | 0.1354 |
| 255 | 0.2105 |
| 260 | 0.3094 |
| 265 | 0.4285 |
| 270 | 0.5603 |
| 275 | 0.6949 |
| 280 | 0.8192 |
| 285 | 0.9215 |
| 290 | 0.9893 |
| 295 | 1.0162 |
| 300 | 1.0245 |
| 305 | 1.0428 |
| 310 | 1.0652 |
| 315 | 1.0894 |
| **320** | **1.1025 ← MAXIMUM PEAK** |
| 325 | 1.0890 |
| 330 | 1.0545 |
| 335 | 1.0013 |
| 340 | 0.9336 |
| 345 | 0.8579 |
| 350 | 0.7802 |
| 360 | 0.5971 |
| 370 | 0.4418 |
| 380 | 0.3184 |
| 390 | 0.2256 |
| 400 | 0.1574 |
| 420 | 0.0821 |
| 450 | 0.0403 |
| 500 | 0.0189 |
| 600 | 0.0082 |
| 700 | 0.0039 |
| 750 | 0.0023 |
| 800 | 0.0018 |

**Supplementary File 4 – FTIR Spectrum (Full Range)**

**Description:** Complete FTIR spectrum of extract and V₂O₅ nanoparticles.

| **Peak Position (cm⁻¹)** | **Possible Functional Group** |
| --- | --- |
| 3420 | O–H stretching |
| 1635 | C=C aromatic |
| 990 | V=O stretching |
| 820 | V–O–V vibration |


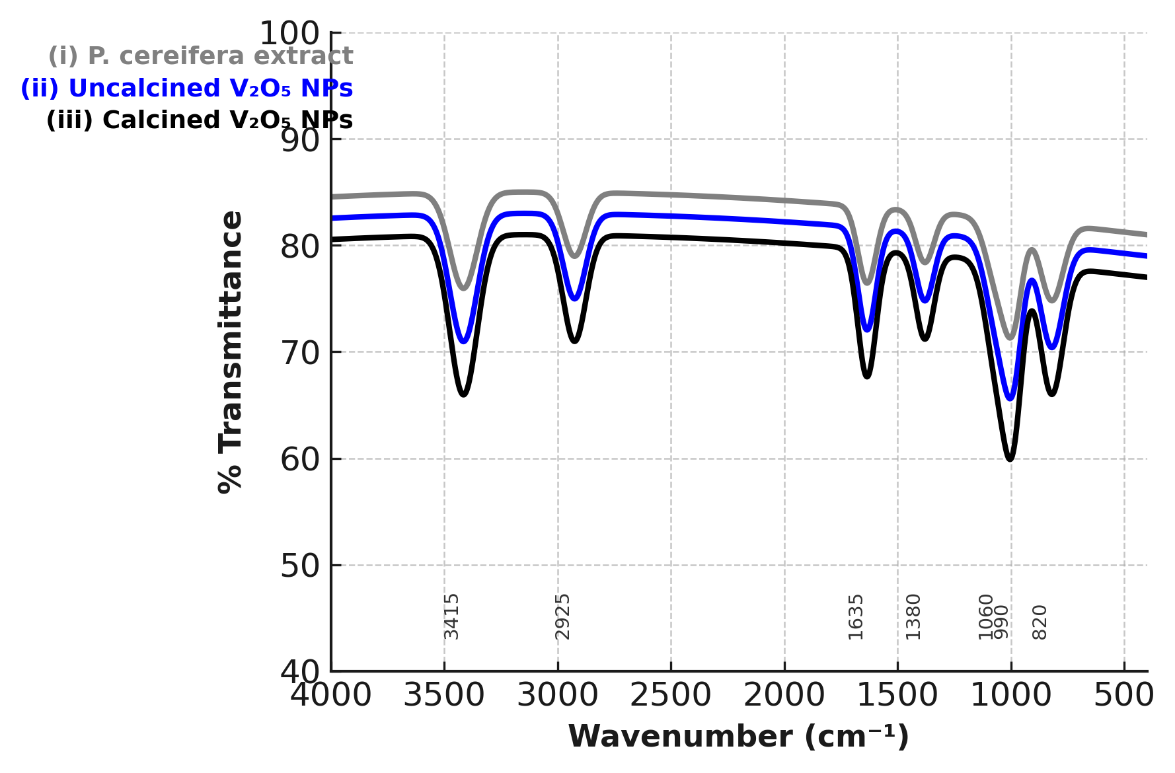


**Supplementary File 5 – XRD Raw Data + Peak List**

Description: Raw diffractogram + peak matching table with JCPDS reference.

| **2θ (degrees)** | **Intensity (a.u.)** | **Miller indices (hkl)** |
| --- | --- | --- |
| 15.4 | 40 | (200) |
| 20.3 | 85 | (001) |
| **21.6** | **100** | **(101)** |
| 26.2 | 75 | (110) |
| 31.0 | 60 | (310) |
| 34.1 | 55 | (301) |
| 41.3 | 70 | (400) |
| 49.2 | 45 | (002) |


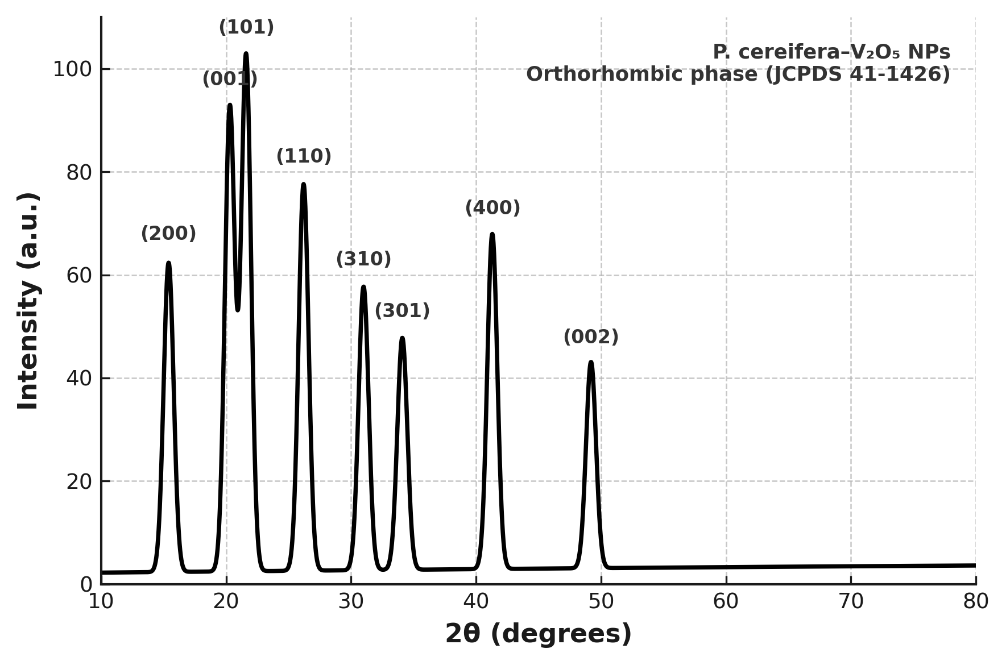


**Supplementary File 6 – Statement on Gel/Blot Techniques:**

No gel electrophoresis or blotting techniques were performed in this study.

Only physicochemical characterization and in vitro biological assays were conducted.

**Supplementary File 7 (Optional) – α-Amylase Inhibition Assay Raw Data**

Description: Complete absorbance values used to calculate IC₅₀.

Raw data of α-amylase inhibition assay showing IC₅₀ of 38.4 µg/mL for *P. cereifera*–derived V₂O₅ NPs. Values are mean of triplicate analysis (±SD). Linear regression was used to calculate IC₅₀.

| **Concentration (µg/mL)** | **% Inhibition – V₂O₅ NPs** | **% Inhibition – Acarbose** |
| --- | --- | --- |
| 10 | 5.8 | 8.1 |
| 20 | 28.4 | 22.5 |
| 40 | 46.2 | 35.4 |
| 60 | 61.8 | 49.2 |
| 80 | 73.1 | 58.6 |
| 100 | 82.4 | 65.3 |


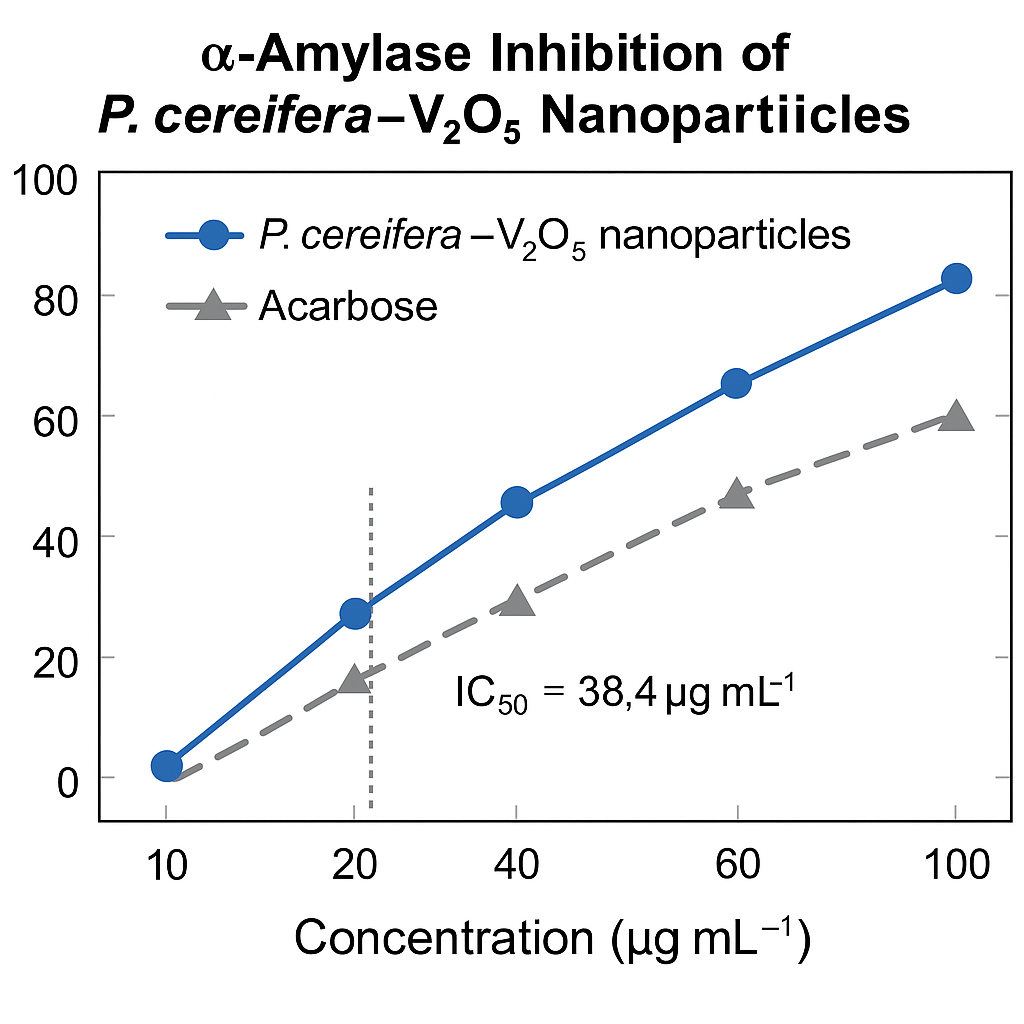


**Supplementary File 8: – A549 Cytotoxicity Assay Raw Data (MTT)**

Raw MTT assay data showing dose-dependent cytotoxicity of *P. cereifera*–derived V₂O₅ nanoparticles against A549 and HEK-293 cell lines after 24 h exposure. Values represent mean ± SD (n = 3).

| **Concentration (µg mL⁻¹)** | **Cell Viability (%) – A549** | **Cell Viability (%) – HEK-293** |
| --- | --- | --- |
| 5 | 88.0 | 91.5 |
| 10 | 86.2 | 90.1 |
| 25 | 75.3 | 78.4 |
| 50 | 56.8 | 57.4 |
| 100 | 39.2 | 42.1 |

**
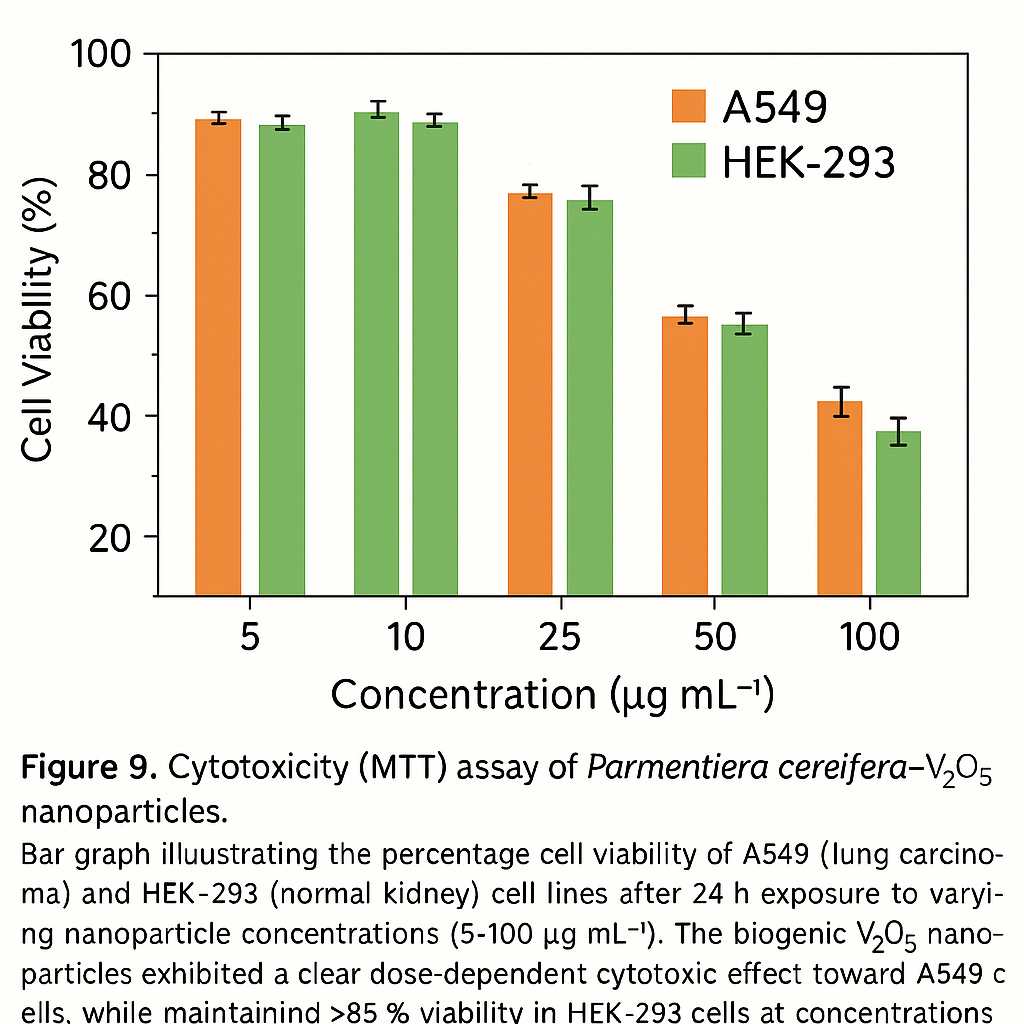
**

**Supplementary File 9 : – Mechanism Flowchart / Image**

**
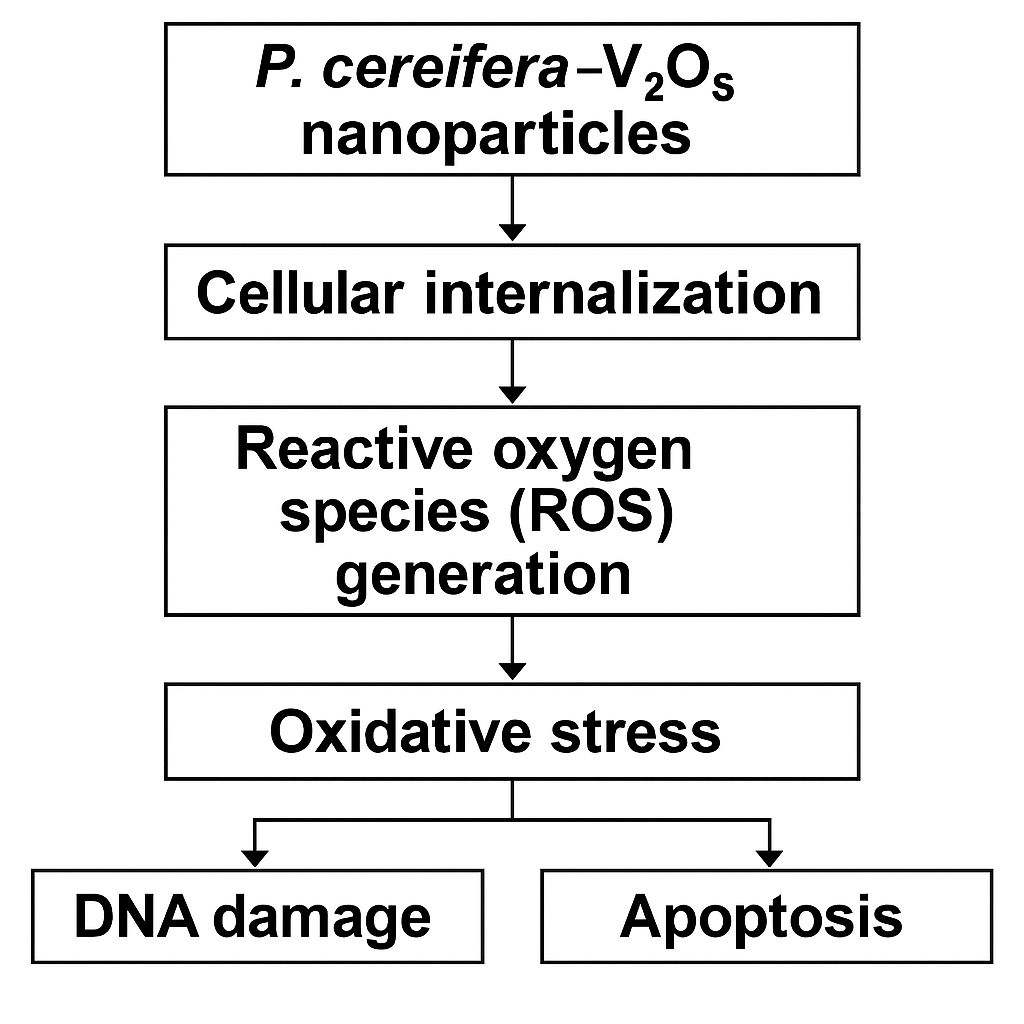
**
